# Supplementary material for: Association of Postoperative Infections After Fractures With Long-term Income Among Adults
Source: PubMed Central journal article supplement (PMC8056283; doi:10.1001/jamanetworkopen.2021.6673), 2021-04-19
Supplement: jamanetwopen-e216673-s001.pdf [file jamanetwopen-e216673-s001.pdf]

## Supplementary Online Content

O'Hara NN, Mullins CD, Slobogean GP, Harris AD, Kringos DS, Klazinga NS. Association of postoperative infections after fractures with long-term income among adults. *JAMA Netw Open*. 2021;4(4):e216673.  
doi:10.1001/jamanetworkopen.2021.6673

**eFigure 1.** Flow Chart

**eFigure 2.** Attrition in Tax Filing

**eFigure 3.** Proportion of Patients Receiving Social Security Benefits

**eFigure 4.** Proportion of Patients Receiving Unemployment Insurance

**eTable 1.** *Current Procedural Terminology (CPT), International Classification of Diseases, 9<sup>th</sup> Revision (ICD-9), and 10<sup>th</sup> Revision (ICD-10) Codes Used to Identify Patients With a Suspected Postoperative Infection*

**eTable 2.** Summary of Missing Data and Methods of Imputations

**eTable 3.** Sensitivity Analysis for Catastrophic Wage Loss After a Postoperative Infection

This supplementary material has been provided by the authors to give readers additional information about their work.

**eFigure 1.** Flow Chart

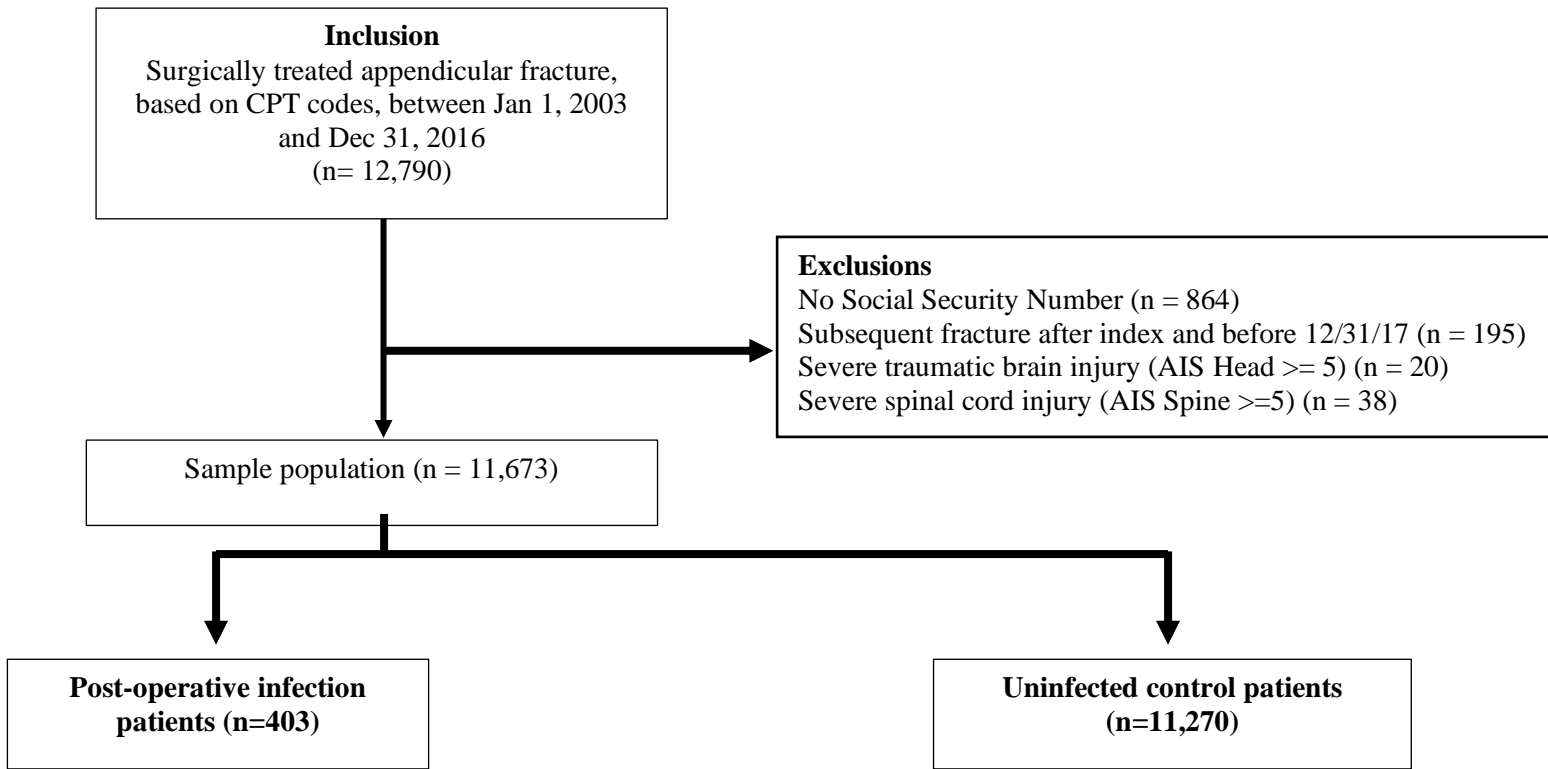

**eFigure 2.** Attrition in Tax Filing

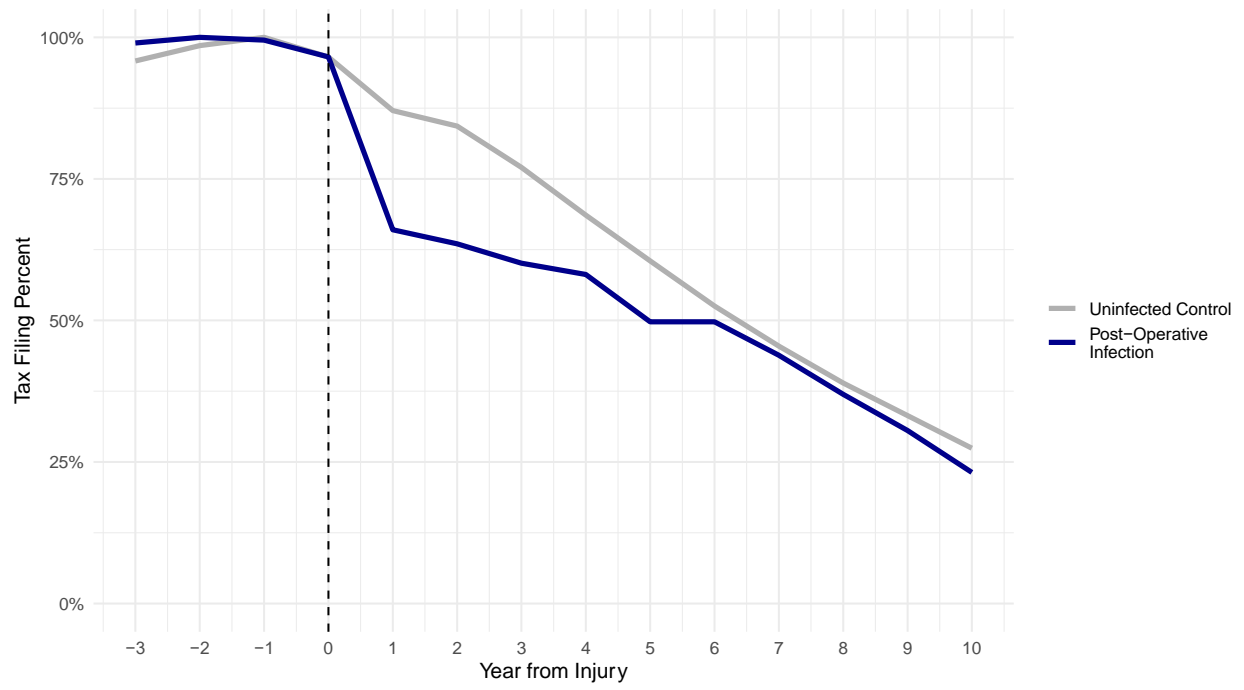

**eFigure 3.** Proportion of Patients Receiving Social Security Benefits  
Proportion Receiving Social Security Benefits

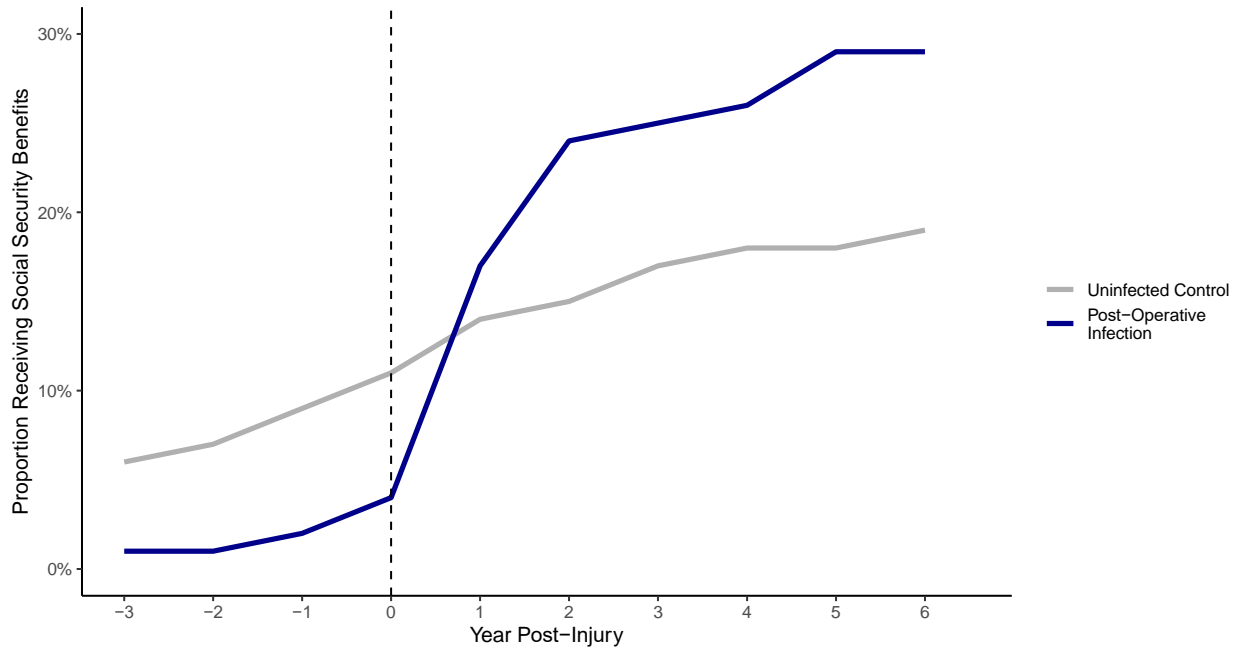

**eFigure 4.** Proportion of Patients Receiving Unemployment Insurance  
Proportion Receiving Unemployment Insurance

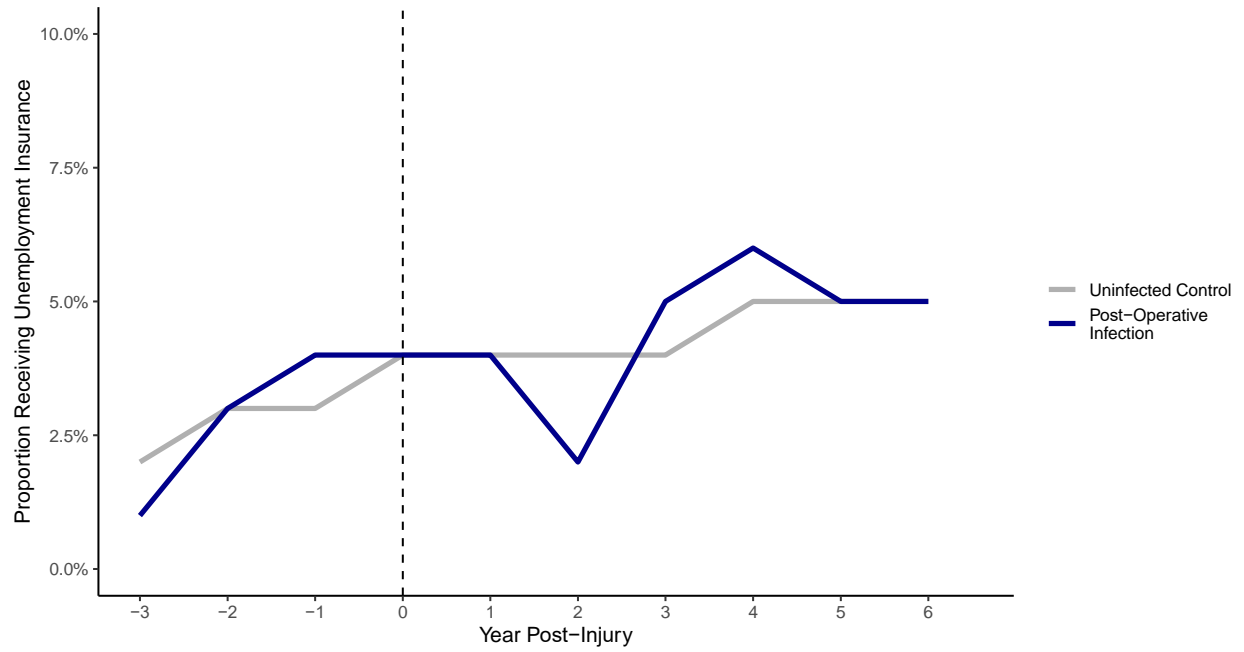

**eTable 1.** Current Procedural Terminology (CPT), International Classification of Diseases, 9<sup>th</sup> Revision (ICD-9), and 10<sup>th</sup> Revision (ICD-10) Codes Used to Identify Patients With a Suspected Postoperative Infection

| Code          | Description                                                                                                                     |
|---------------|---------------------------------------------------------------------------------------------------------------------------------|
| <i>ICD-9</i>  |                                                                                                                                 |
| 730.2         | Unspecified osteomyelitis                                                                                                       |
| 730.20        | Unspecified osteomyelitis site unspecified                                                                                      |
| 730.21        | Unspecified osteomyelitis involving shoulder region                                                                             |
| 730.22        | Unspecified osteomyelitis involving upper arm                                                                                   |
| 730.23        | Unspecified osteomyelitis involving forearm                                                                                     |
| 730.24        | Unspecified osteomyelitis involving hand                                                                                        |
| 730.25        | Unspecified osteomyelitis involving pelvic region and thigh                                                                     |
| 730.26        | Unspecified osteomyelitis involving lower leg                                                                                   |
| 730.27        | Unspecified osteomyelitis involving ankle and foot                                                                              |
| 730.28        | Unspecified osteomyelitis involving other specified sites                                                                       |
| 730.29        | Unspecified osteomyelitis involving multiple sites                                                                              |
| 998.5         | Postoperative infection not elsewhere classified                                                                                |
| 996.67        | Infection and inflammatory reaction due to other internal orthopedic device implant and graft                                   |
| <i>ICD-10</i> |                                                                                                                                 |
| T81.3         | Disruption of wound, not elsewhere classified                                                                                   |
| T81.30        | Disruption of wound, unspecified                                                                                                |
| T81.31        | Disruption of external operation (surgical) wound, not elsewhere classified                                                     |
| T81.32        | Disruption of internal operation (surgical) wound, not elsewhere classified                                                     |
| T81.33        | Disruption of traumatic injury wound repair                                                                                     |
| T81.4         | Code for Infection following a procedure                                                                                        |
| T81.40        | Code for Infection following a procedure, unspecified                                                                           |
| T81.41        | Infection following a procedure, superficial incisional surgical site                                                           |
| T81.42        | Infection following a procedure, deep incisional surgical site                                                                  |
| T81.43        | Infection following a procedure, organ and space surgical site                                                                  |
| T81.44        | Sepsis following a procedure                                                                                                    |
| T81.49        | Infection following a procedure, other surgical site                                                                            |
| T84.5         | Infection and inflammatory reaction due to internal joint prosthesis                                                            |
| T84.51        | Infection and inflammatory reaction due to internal right hip prosthesis                                                        |
| T84.52        | Infection and inflammatory reaction due to internal left hip prosthesis                                                         |
| T84.53        | Infection and inflammatory reaction due to internal right knee prosthesis                                                       |
| T84.54        | Infection and inflammatory reaction due to internal left knee prosthesis                                                        |
| T84.59        | Infection and inflammatory reaction due to other internal joint prosthesis                                                      |
| T84.6         | Infection and inflammatory reaction due to internal fixation device                                                             |
| T84.60        | Infection and inflammatory reaction due to internal fixation device of unspecified site                                         |
| T84.61        | Infection and inflammatory reaction due to internal fixation device of arm                                                      |
| T84.62        | Infection and inflammatory reaction due to internal fixation device of leg                                                      |
| T84.63        | Code for Infection and inflammatory reaction due to internal fixation device of spine                                           |
| T84.69        | Infection and inflammatory reaction due to internal fixation device of other site                                               |
| T84.7         | Infection and inflammatory reaction due to other internal orthopedic prosthetic devices, implants and grafts                    |
| T84.7XXA      | Infection and inflammatory reaction due to other internal orthopedic prosthetic devices, implants and grafts, initial encounter |

|                  |                                                                                                                                 |
|------------------|---------------------------------------------------------------------------------------------------------------------------------|
| T84.7XXD         | Infection and inflammatory reaction due to other internal orthopedic prosthetic devices, implants and grafts, initial encounter |
| T84.7XXS         | Infection and inflammatory reaction due to other internal orthopedic prosthetic devices, implants and grafts, sequela           |
| M86.9            | Osteomyelitis, unspecified                                                                                                      |
|                  |                                                                                                                                 |
| <i>CPT Codes</i> |                                                                                                                                 |
| 11011            | Debridement including removal of foreign material associated with open fracture(s) and/or dislocation(s)                        |
| 11012            | Debridement including removal of foreign material associated with open fracture(s) and/or dislocation(s)                        |
| 11043            | Under Debridement Procedures on the Skin                                                                                        |
| 11044            | Under Debridement Procedures on the Skin                                                                                        |
| 10180            | Under Incision and Drainage Procedures on the Skin, Subcutaneous and Accessory Structures                                       |
| 27360            | Under Excision Procedures on the Femur (Thigh Region) and Knee Joint                                                            |
| 27640            | Under Excision Procedures on the Leg (Tibia and Fibula) and Ankle Joint                                                         |
| 28120            | Under Excision Procedures on the Foot and Toes                                                                                  |
| 28122            | Under Excision Procedures on the Foot and Toes                                                                                  |

**eTable 2.** Summary of Missing Data and Methods of Imputations

| <b>Covariate</b>                     | <b>Missing Data<br/>(n=11,673)</b> | <b>Imputation<br/>Method</b>   |
|--------------------------------------|------------------------------------|--------------------------------|
| <b>Age, n (%)</b>                    | 0 (0%)                             | NA                             |
| <b>Male, n (%)</b>                   | 0 (0%)                             | NA                             |
| <b>Race, n (%)</b>                   | 133 (1.1%)                         | Polytomous logistic regression |
| <b>Area Deprivation Index, n (%)</b> | 2214 (19.0%)                       | Predictive mean matching       |
| <b>Mechanism of injury, n (%)</b>    | 0 (0%)                             | NA                             |
| <b>Injury type, n (%)</b>            | 0 (0%)                             | NA                             |
| <b>Glasgow Comma Score, n (%)</b>    | 0 (0%)                             | NA                             |
| <b>Health insurance, n (%)</b>       | 0 (0%)                             | NA                             |
| <b>Abbreviated Injury Scale</b>      |                                    | NA                             |
| Lower extremity, n (%)               | 0 (0%)                             | NA                             |
| Upper extremity, n (%)               | 0 (0%)                             | NA                             |
| Abdominal, n (%)                     | 0 (0%)                             | NA                             |
| Face, n (%)                          | 0 (0%)                             | NA                             |
| Head, n (%)                          | 0 (0%)                             | NA                             |
| Neck, n (%)                          | 0 (0%)                             | NA                             |
| Spine, n (%)                         | 0 (0%)                             | NA                             |
| Chest, n (%)                         | 0 (0%)                             | NA                             |
| <b>Comorbidities</b>                 |                                    | NA                             |
| Alcohol dependence, n (%)            | 0 (0%)                             | NA                             |
| Cancer, n (%)                        | 0 (0%)                             | NA                             |
| Depression, n (%)                    | 0 (0%)                             | NA                             |
| Diabetes, n (%)                      | 0 (0%)                             | NA                             |
| IV drug use, n (%)                   | 0 (0%)                             | NA                             |
| Non-IV drug use, n (%)               | 0 (0%)                             | NA                             |
| Hypertension, n (%)                  | 0 (0%)                             | NA                             |
| Tobacco use, n (%)                   | 0 (0%)                             | NA                             |
| <b>Fracture location, n (%)</b>      | 0 (0%)                             | NA                             |
| <b>Open fracture, n (%)</b>          | 0 (0%)                             | NA                             |



**eTable 3.** Sensitivity Analysis for Catastrophic Wage Loss After a Postoperative Infection

| <b>Level of Catastrophic Wage Loss</b> | <b>Years Post-Injury</b> | <b>Post-Operative Infection (n=160)</b> | <b>Unexposed Control (n=4597)</b> | <b>Adjusted Mean Difference (95% CI)</b> | <b>P Value</b>   |
|----------------------------------------|--------------------------|-----------------------------------------|-----------------------------------|------------------------------------------|------------------|
| <b>50%</b>                             | <b>2 years</b>           | <b>46 (28.8%)</b>                       | <b>833 (18.1%)</b>                | <b>6.6% (4.9 to 8.3)</b>                 | <b>&lt;0.001</b> |
|                                        | 5 years                  | 53 (31.5%)                              | 861 (18.1%)                       | 6.8% (5.1 to 8.6)                        | <0.001           |
| 25%                                    | 2 years                  | 68 (42.5%)                              | 1384 (30.1%)                      | 4.3% (2.3 to 6.2)                        | <0.001           |
|                                        | 5 years                  | 70 (41.7%)                              | 1382 (29.1%)                      | 4.4% (2.5 to 6.3)                        | <0.001           |
| 75%                                    | 2 years                  | 23 (14.4%)                              | 456 (9.9%)                        | 7.5% (6.1 to 9.0)                        | <0.001           |
|                                        | 5 years                  | 27 (16.1%)                              | 490 (10.3%)                       | 6.4% (5.0 to 7.8)                        | <0.001           |

**Note:** Mean differences were adjusted using inverse probability of treatment weighting.
